# Supplementary material for: STIC2 selectively binds ribosome-nascent chain complexes in the cotranslational sorting of Arabidopsis thylakoid proteins
Source: PubMed Central journal article supplement (PMC11480477; doi:10.1038/s44318-024-00211-4), 2024-08-27
Supplement: 44318_2024_211_MOESM1_ESM.pdf [file 44318_2024_211_MOESM1_ESM.pdf]

## Appendix for

# STIC2 selectively binds ribosome-nascent chain complexes in the cotranslational sorting of *Arabidopsis* thylakoid proteins

Stolle, Osterhoff et al.

### Content:

#### Appendix Figures:

|                                                                                                                                   |    |
|-----------------------------------------------------------------------------------------------------------------------------------|----|
| <b>Appendix Figure S1</b> Sucrose gradient enrichment and affinity purification of ribosomes translating TST-tagged peptides..... | p2 |
| <b>Appendix Figure S2</b> Comparison of proteins identified in TST-D1 and TST-uS2c RNCs....                                       | p3 |
| <b>Appendix Figure S3</b> Verification of homozygous <i>ffc stic2</i> plants.....                                                 | p4 |
| <b>Appendix Figure S4</b> Characterization of <i>Arabidopsis</i> WT and mutant plants.....                                        | p5 |
| <b>Appendix Figure S5</b> Membrane bound Alb3- and Alb4-peptide arrays used for the interaction analyses with STIC2.....          | p6 |
| <b>Appendix Figure S6</b> The binding interface of STIC2 with Alb4C and Alb3C.....                                                | p7 |

#### Appendix Tables:

|                                      |      |
|--------------------------------------|------|
| <b>Appendix Table S1</b> Primer..... | p8-9 |
|--------------------------------------|------|

|                                                           |     |
|-----------------------------------------------------------|-----|
| <b>Appendix Supplementary Materials and Methods</b> ..... | p10 |
|-----------------------------------------------------------|-----|

|                                                |     |
|------------------------------------------------|-----|
| <b>Appendix Supplementary References</b> ..... | p11 |
|------------------------------------------------|-----|

## Appendix Figures

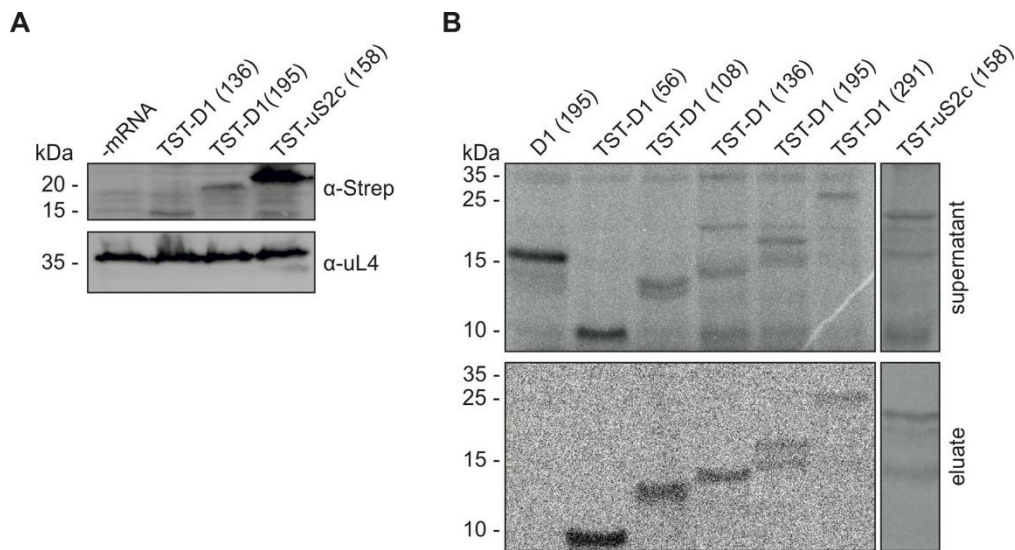

### Appendix Figure S1 Sucrose gradient enrichment and affinity purification of ribosomes translating TST-tagged peptides

Stalled RNCs with nascent TST-D1 peptides of the indicated lengths and TST-uS2c (158) were generated using the pea chloroplast-derived *in vitro* translation system. Details on the various constructs are given in Figure 1.

**A.** Enrichment of TST-D1 (136), TST-D1 (195), and TST-uS2c (158) RNCs via 1 M sucrose cushion centrifugation. A translation sample lacking mRNA was used as a control. The sedimented protein complexes were separated with SDS-PAGE and applied to Western blot analysis. RNCs with 15 kDa and 20 kDa TST-D1 or 22 kDa TST-uS2c peptides were detected with antibody against the TST ( $\alpha$ -Strep) and the ribosomal protein uL4 ( $\alpha$ -uL4).

**B.** In the presence of radiolabeled methionine, truncated D1 and uS2c peptides were synthesized *in vitro* and subsequently incubated with MagStrep XT magnetic beads for affinity-based purification. A truncated D1 (195) peptide lacking the TST was synthesized as a negative control for the affinity purification (first lane). Unbound RNCs were removed with the supernatant in a magnetic separator. The magnetic beads were washed and remaining RNCs were subsequently released with native elution. Supernatant (upper panel) and eluate (lower panel) were subjected to SDS-PAGE and synthesized peptides were detected by phosphor imaging.

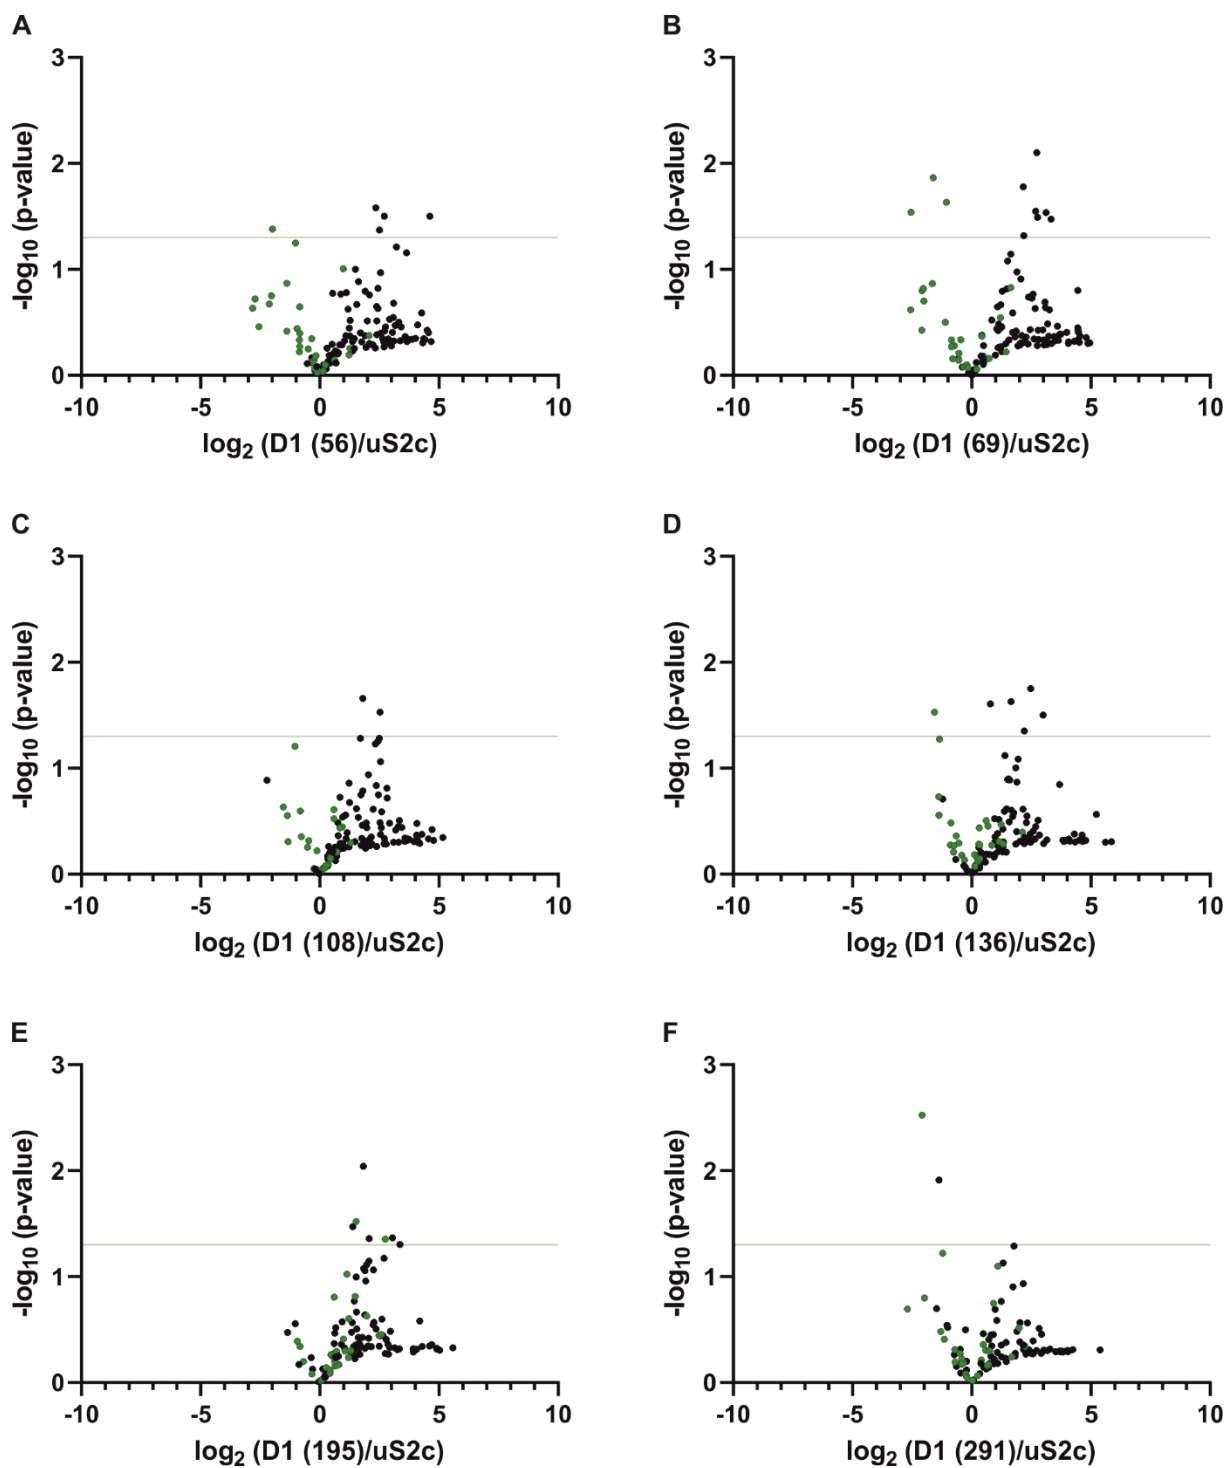

**Appendix Figure S2** Comparison of proteins identified in TST-D1 and TST-uS2c RNCs

**A-F.** Volcano plots representing proteins identified by tandem MS in RNCs with TST-uS2c (158) and TST-D1 peptides of different length. *P*-values ( $-\log_{10}$ ) were plotted against the ratio of label-free quantification intensity means ( $\log_2$ ). The *p*-values were determined by two-sided *t*-test ( $p \leq 0.05$ ). Ribosomal proteins are labeled in green.

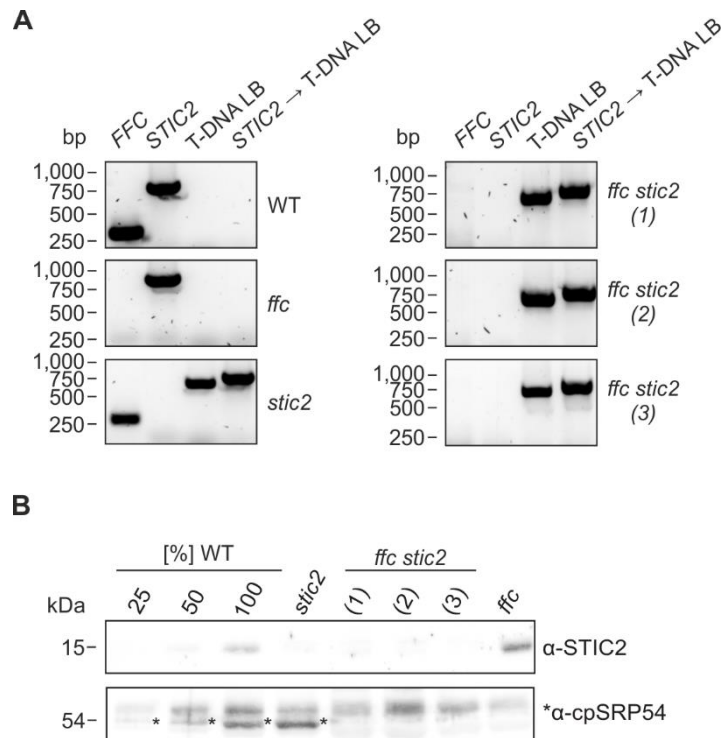

### Appendix Figure S3 Verification of homozygous *ffc stic2* plants

The *Arabidopsis thaliana* double mutant *ffc1-2 stic2-3* (*ffc stic2*) was created by crossing the homozygous single mutant plants *ffc1-2* (*ffc*) and *stic2-3* (*stic2*) with *stic2* as female plant. Putative *ffc stic2* double mutants (*ffc stic2* (1), (2), and (3)) of the F2 generation were verified via genotyping PCRs (**A**) and immunoblotting (**B**).

**A.** Wild-type plants of the ecotype Columbia-0 (Col-0), the *ffc* and *stic2* mutants were used as controls. Gene-specific primer combinations were used to prove DNA insertions in *ffc* (At5g03940, lane FFC) and *stic2* (At2g24020, lane STIC2). The T-DNA insertion was verified by amplifying its left border (T-DNA LB). Proof of proper T-DNA insertion in *stic2* was analyzed by amplification of the junction from the 5'UTR to the T-DNA left border. Bands at 319, 821, about 600 and 750 bp display PCR products of *ffc*, *stic2*, the T-DNA left border and the junction from *stic2* 5' UTR to the T-DNA left border.

**B.** Total protein extracts from leaves of 5-week-old *Arabidopsis thaliana* plants (wild-type (Col-0), *stic2*, *ffc* and the putative double mutants *ffc stic2* (1), (2) and (3)) were separated by SDS-PAGE and analyzed via immunoblotting regarding the expression of cpSRP54 and STIC2. The loading control is the same as in Figure 3.

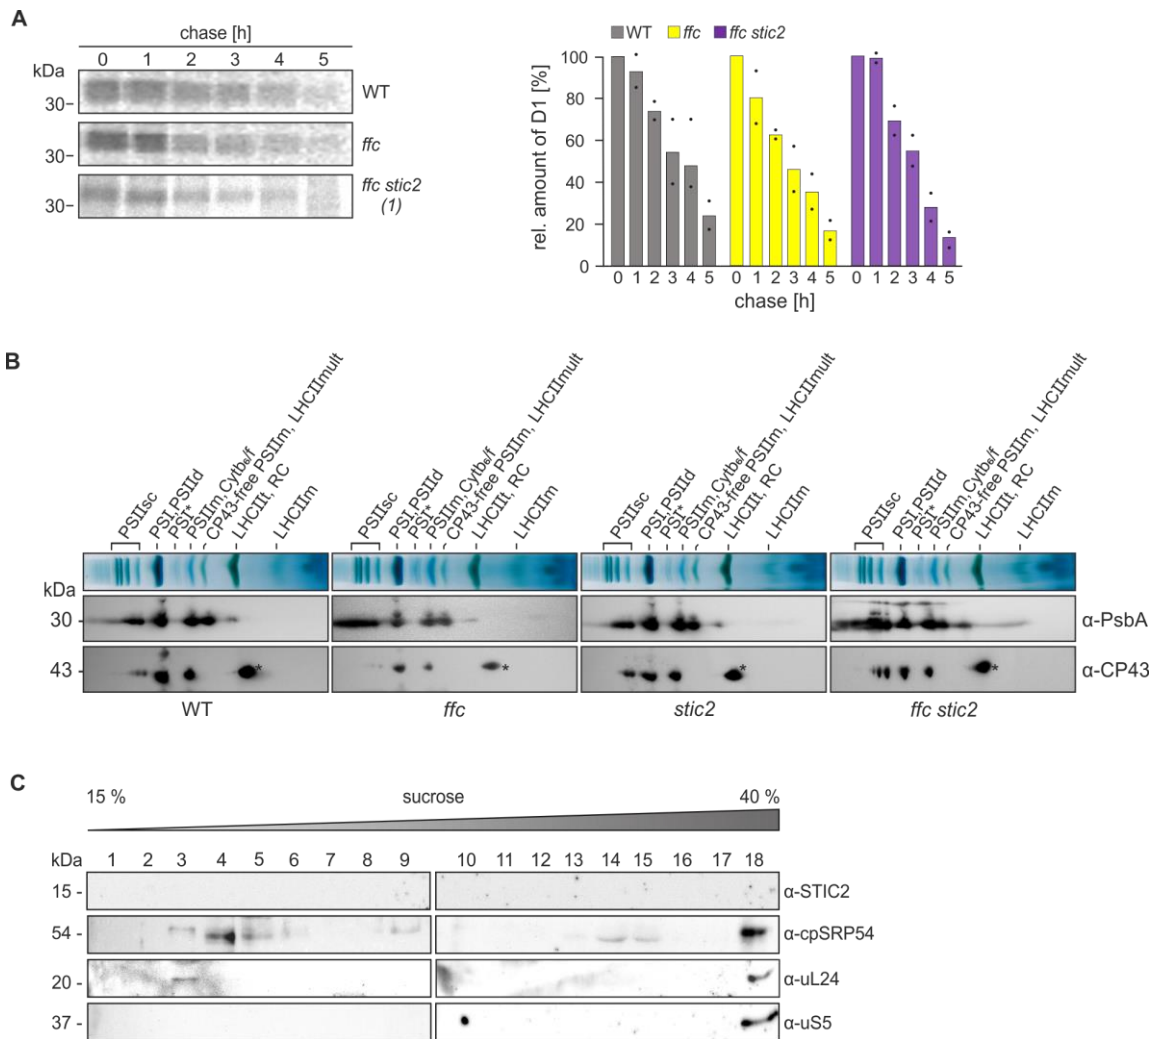

## Appendix Figure S4 Characterization of *Arabidopsis* WT and mutant plants

**A.** Leaf discs of wild type (Col-0) and the indicated *A. thaliana* mutants were labeled with [<sup>35</sup>S]-methionine in presence of cycloheximide for 60 min in ambient light (0 h chase). After removal of [<sup>35</sup>S]-methionine the labeled D1 protein was chased for 1, 2, 3, 4 and 5 hours under high light (1000  $\mu\text{mol photons m}^{-2} \text{s}^{-1}$ ). Labeled thylakoid membrane proteins were used for SDS-PAGE and phosphor imaging. Signals from two independent experiments were quantified in relation to 0 h chase time using ImageJ.

**B.** Thylakoids isolated from chloroplasts of *Arabidopsis thaliana* plants (Col-0, *ffc1-2* (*ffc*), *stic2-3* (*stic2*) and *ffc1-2 stic2-3* (*ffc stic2*)) were solubilized in DDM and separated by BN-PAGE based on equal chlorophyll loading (10  $\mu\text{g}$  chlorophyll/lane). The identification of detected bands was accomplished in accordance with published BN-PAGE profiles of *Arabidopsis* thylakoids (Granvogl et al. 2006; Armbruster et al. 2010; Wittenberg et al. 2017; Che et al. 2022). Photosystem I and II (PSI and PSII) supercomplexes (PSII<sub>sc</sub>), PSII dimers (PSII<sub>d</sub>), PSI assembly intermediate (PSI\*), monomeric PSII (PSII<sub>m</sub>) and Cytochrom *b*<sub>6</sub>/*f* complex (Cytb<sub>6</sub>/*f*), CP43-free PSII monomers (CP43-free PSII<sub>m</sub>) and multimeric light harvesting antenna complex II (LHCII<sub>mult</sub>), trimeric LHCII (LHCII<sub>t</sub>), reaction center-like complex (RC), monomeric (LHCII<sub>m</sub>). Additionally, the protein complex subunit composition was determined by two-dimensional BN-PAGE/SDS-PAGE analysis followed by immunoblot analysis using  $\alpha$ -PsbA and  $\alpha$ -CP43 antibodies (Agrisera) directed against the PS II subunits D1 and CP43, respectively. The asterisk (\*) marks free CP43 protein.

**C.** A cell extract of the *stic2-3* plant was subjected to sucrose gradient centrifugation in the presence of chloramphenicol. Gradient fractions were separated by SDS-PAGE and applied to immunoblotting using the indicated antibodies.

**A**

Alb3 155-208

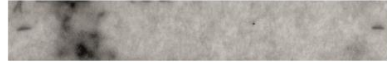

- 1 2 3 4 5 6 7 8 9 10 11 -  
 1 TYPLTKQVESTLAM 7 IQQRYAGNQERIQL  
 2 TKQVESTLAMQNLQ 8 YAGNQERIQLTSRL  
 3 VESTLAMQNLQPKIK 9 QERIQLTSRLYKQA  
 4 LAMQNLQPKIKAIQQ 10 QLETSLRYKQAGVNP  
 5 NLQPKIKAIQQRYAG 11 TSRLYKQAGVNPLAG  
 6 KIKAIQQRYAGNQR

Alb3 282-462

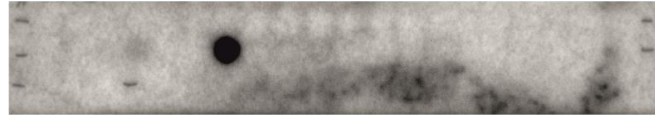

- 1 2 3 4 5 6 7 8 9 10 11 12 13 14 15 16 17 18 19 20 -  
 - 21 22 23 24 25 26 27 28 29 30 31 32 33 34 35 36 37 38 39 40 -  
 - 41 42 43 -  
 1 LVLPLLIIASQYVSM 15 WLTNNVLSTAQQVYL 29 EQEKRSKKNKAVAKD  
 2 VLLIASQYVSMMEIMK 16 NVLSTAQQVYLRKLG 30 RSKKNKAVAKDTVEL  
 3 ASQYVSMMEIMKPPQT 17 TAQQVYLRKLGGAKP 31 NKAVAKDTVELVEES  
 4 VSMEIMKPPQTDPA 18 VYLRKLGGAKPNMDE 32 AKDTVELVEESQSES  
 5 IMKPPQTDPAQKNT 19 KLGGAKPNMDENASK 33 VELVEESQSESEEGS  
 6 PQTDDPAQKNTLLVF 20 AKPNMDENASKIISA 34 EESQSESEEGSDDEE  
 7 DPAQKNTLLVFKFLP 21 MDENASKIISAGRAK 35 SESEEGSDDEEEEAR  
 8 KNTLLVFKFLPLMIG 22 ASKIIISAGRAKRSIA 36 EGSDEEEAREGAL  
 9 LVFKFLPLMIGYFAL 23 ISAGRAKRSIAQDD 37 DEEEAREGALASST  
 10 FLPLMIGYFALSVP 24 RAKRSIAQDDAGER 38 EAREGALASSTTSKP  
 11 MIGYFALSVPGLSI 25 SIAQDDAGERFRQL 39 GALASSTTSKPLPEV  
 12 FALSVPGLSIYWLT 26 PDDAGERFRQLKEQE 40 SSTTSKPLPEVGQRR  
 13 VPSGLSIYWLTNNVL 27 GERFRQLKEQEKRSK 41 SKPLPEVGQRRSKRS  
 14 LSIYWLTNNVLSTAQ 28 RQLKEQEKRSKKKA 42 PEVGQRRSKRSKRKR  
 43 VGQRRSKRSKRKRRTV

**B**

Alb4 139-192

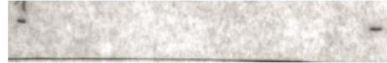

- 1 2 3 4 5 6 7 8 9 10 11 -  
 1 TFPLTKKQVESAMAM 7 IQERYAGDQEKIQL  
 2 TKKQVESAMAMKSLT 8 YAGDQEKIQLTARL  
 3 VESAMAMKSLTPQIK 9 QEKIQLTARLYKLA  
 4 MAMKSLTPQIKAIQE 10 QLETARLYKLAGINP  
 5 SLTPQIKAIQERYAG 11 TARLYKLAGINPLAG  
 6 QIKAIQERYAGDQEK

Alb4 266-499

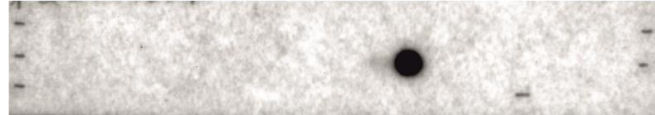

- 1 2 3 4 5 6 7 8 9 10 11 12 13 14 15 16 17 18 19 20 -  
 - 21 22 23 24 25 26 27 28 29 30 31 32 33 34 35 36 37 38 39 40 -  
 - 41 42 43 44 45 46 47 48 49 50 51 52 53 54 55 56 -  
 1 LVLPLLIVFSQYLSI 20 AKNPVEKFTNLVTKE 39 QKAEAAALSNQNTDKA  
 2 LLLVFSQYLSIQIMQ 21 VEKFTNLVTKEDKTQ 40 AALSNQNTDKAHEQD  
 3 FSQYLSIQIMQSSQS 22 TNLVTKEDKTQQIEK 41 NQNTDKAHEQDEKSD  
 4 LSIQIMQSSQSNDDPA 23 TKEDKTQQIEKSFSE 42 DKAHEQDEKSDTAIV  
 5 IMQSSQSNDDPAMKSS 24 KTQQIEKSFSEPLVQ 43 EQDEKSDTAIVAEDD  
 6 SQSNDDPAMKSSQAVT 25 IEKSFSEPLVQKSVS 44 KSDTAIVAEDDDKTE  
 7 DPAMKSSQAVTKLLP 26 FSEPLVQKSVSELKI 45 AIVAEDDDKTELSAV  
 8 KSSQAVTKLLPLMIG 27 LVQKSVSELKIPREK 46 EDDKTELSAVDETS  
 9 AVTKLLPLMIGYFAL 28 SVSELKIPREKGGEK 47 KTELSAVDETSVAVNG  
 10 LLLPLMIGYFALSVP 29 LKIPREKGGEKVTP 48 SAVDETSVAVNG  
 11 MIGYFALSVPGLSL 30 REKGGEKVTPESP 49 ETSVAVNGKPSI  
 12 FALSVPGLSLYWLT 31 GEKVPESP 50 GTVAVNGKPSIQKDE  
 13 VPSGLSLYWLTNNIL 32 TPESP 51 VNGKPSIQKDETTNG  
 14 LSLYWLTNNILSTAQ 33 PKPGERFRLLKEQE 52 PSIQKDETTNGTFGI  
 15 WLTNNILSTAQQVWL 34 ERFRLLEQEAKRRR 53 KDETTNGTFGIGHDT  
 16 NILSTAQQVWLQYK 35 LLKEQEAKRRREKEE 54 TNGTFGIGHDEQQH  
 17 TAQQVWLQYGGAKN 36 QEAKRRREKEERQKA 55 FGIGHDEQQHSHT  
 18 VWLQYGGAKNPVEK 37 RRREKEERQKAEAL 56 GHDTEQQHSHETEK  
 19 KYGGAKNPVEKFTNL 38 KEERQKAEAAALSNQN

## Appendix Figure S5 Membrane bound Alb3- and Alb4-peptide arrays used for the interaction analyses with STIC2

**A.** Peptides covering Alb3 residues 155-208 and 282-462 (15mer peptides) were incubated with His-mSTIC2 (aa 49-182) at a final concentration of 5 µg/ml. The peptide sequences are indicated below the pepsot membranes. An antibody-HRP conjugate against the His-tag was used to detect His-mSTIC2 protein on pepsot membranes.

**B.** Peptides covering Alb4 residues 139-192 and 266-499 were analyzed as in **A**.

Further details are given in Materials and Methods and Figure 5A in the main text. The peptide arrays shown in the right panels of this figure and in Figure 5A are identical.



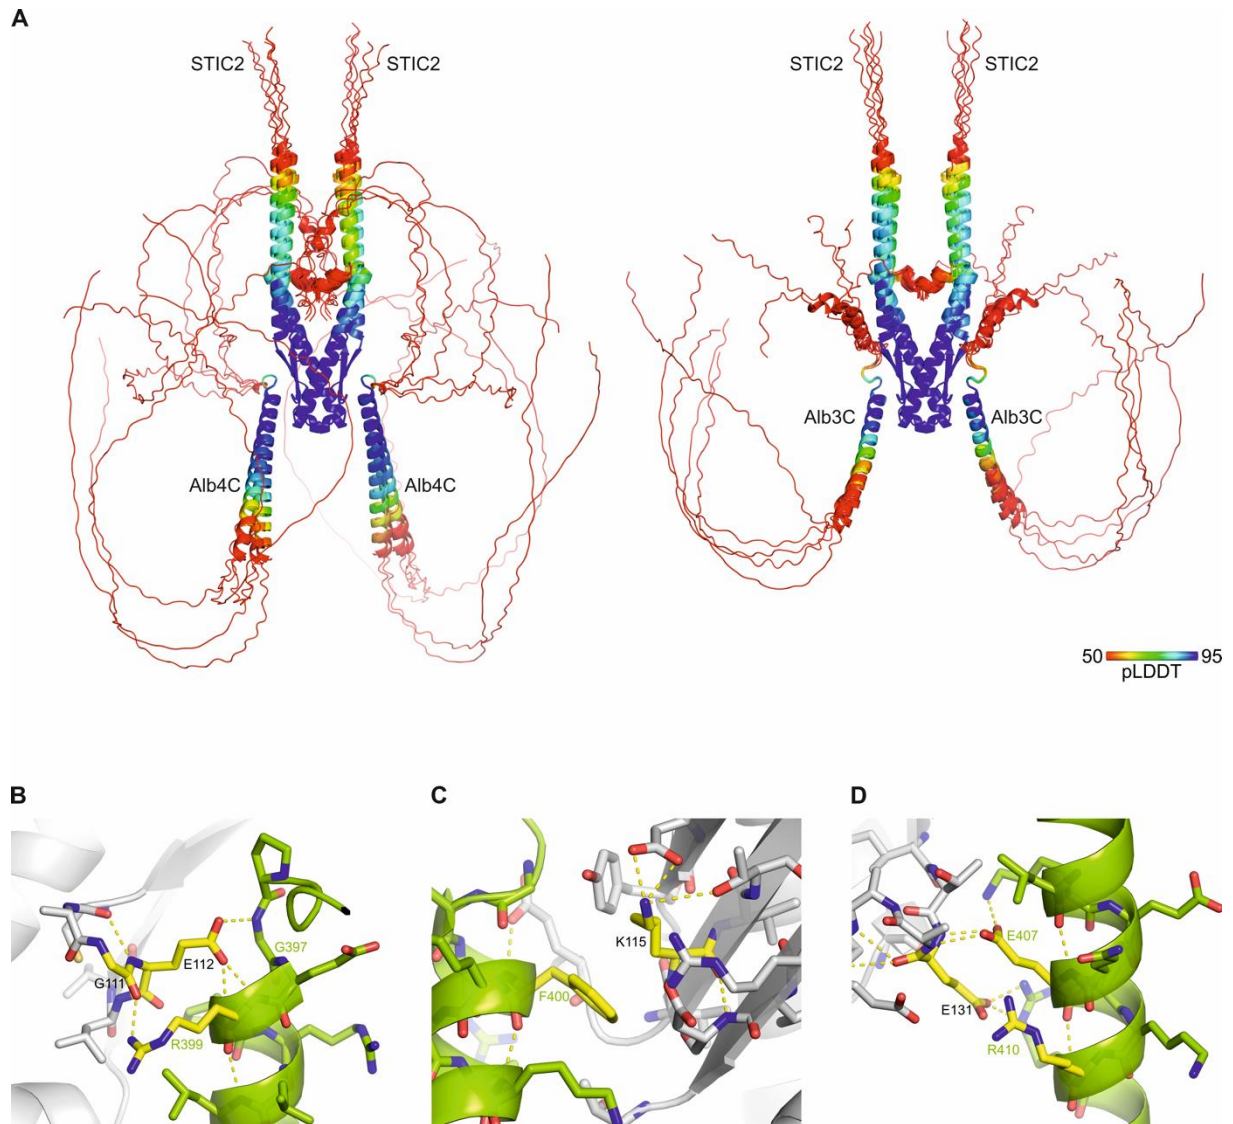

**Appendix Figure S6** The binding interface of STIC2 with Alb4C and Alb3C

**A.** AlphaFold-Multimer models of STIC2 in complex with Alb4C (left) and Alb3C (right). The five models of each prediction run are superposed in cartoon representation. Coloring according to the residue specific pLDDT quality score from 50-95 (see inset), blue being the most reliable.

**B-D.** Interactions between STIC2 and Alb4C. Detailed view of interactions of residues discussed in the text. Proteins are shown in cartoon representation in grey and green for STIC2 and Alb4C, respectively. Residues under investigation are shown as yellow sticks with their polar interactions as defined in Pymol. In addition, residues within 4 Å are shown as grey/green sticks.

## Appendix Tables

### Appendix Table S1 Primer

| Construct                                                            | Sequence (5' → 3')                                                                                             | Cloning strategy          |
|----------------------------------------------------------------------|----------------------------------------------------------------------------------------------------------------|---------------------------|
| <b>Generation of DNA templates for <i>in vitro</i> transcription</b> |                                                                                                                |                           |
| TST-D1 (aa 1-56)                                                     | for: GTAATACGACTCACTATAGGGCGAGTAACAAGC<br>CCTTAATTCTATAGTTA<br>rev: AGGGGCAGCAATGAAAGCG                        |                           |
| TST-D1 (aa 1-69)                                                     | for: GTAATACGACTCACTATAGGGCGAGTAACAAGC<br>CCTTAATTCTATAGTTA<br>rev: TCCAGAAACAGGCTCACGAATACC                   |                           |
| TST-D1 (aa 1-108)                                                    | for: GTAATACGACTCACTATAGGGCGAGTAACAAGC<br>CCTTAATTCTATAGTTA<br>rev: CGTTGTATAACCATTTCATCAACGGATGC              |                           |
| TST-D1 (aa 1-136)                                                    | for: GTAATACGACTCACTATAGGGCGAGTAACAAGC<br>CCTTAATTCTATAGTTA<br>rev: GACGAAAACAAAGTTCCCACTCACG                  |                           |
| TST-D1 (aa 1-195)                                                    | for: GTAATACGACTCACTATAGGGCGAGTAACAAGC<br>CCTTAATTCTATAGTTA<br>rev: GGTGCATAAGAATATTATGCTCAGCC                 |                           |
| TST-D1 (aa 1-291)                                                    | for: GTAATACGACTCACTATAGGGCGAGTAACAAGC<br>CCTTAATTCTATAGTTA<br>rev: GCTGATACCTAACGCGGTAAACCAG                  |                           |
| TST-uS2c (aa 1-58)                                                   | for: TAATACGACTCACTATAGGG<br>rev: CATATATTTAATCCCGCCTAGATATG                                                   |                           |
| <b>Genotyping PCRs</b>                                               |                                                                                                                |                           |
| <i>FFC</i>                                                           | for: GATAAAGGCATGATGGACGAATTTAAAGACG<br>rev: CAAACCTCCTTGACACTCAAAGCAGCACCACC                                  |                           |
| <i>STIC2</i>                                                         | for: CAATCTAAGCTCAAAAAAAGAGTTAAAGTGACG<br>rev: GAACACGTACAGCTTCCAATTGAACAACC                                   |                           |
| T-DNA LB                                                             | for: CTGCCTGTATCGAGTGGTGA<br>rev: ACTTAATCGCCTTGCAGCAC                                                         |                           |
| <i>STIC2</i> → T-DNA LB                                              | for: CAATCTAAGCTCAAAAAAAGAGTTAAAGTGACG<br>rev: ACTTAATCGCCTTGCAGCAC                                            |                           |
| <b>pET-Duet1-</b>                                                    |                                                                                                                |                           |
| STIC2 (aa 49-182)                                                    | for: CATCACCATCATCACACAGCCAGGTGAATGGA<br>TTATTTGGAGGTGGAA<br>rev: GCGGCCGCAAGCTTGTCGACTTACTTCATTCC<br>TTCGCTGA | InFusion                  |
| STIC2 (aa 64-182)                                                    | for: TCATCACACAGCCAGGATCCGGATGGACAAT<br>CAAAGGCAGGA<br>rev: GCGGCCGCAAGCTTGTCGACTTACTTCATTCC<br>TTCGCTGA       | InFusion                  |
| STIC2 G111L                                                          | for: GATGGTTATTGTGCATTAGAGCTTGTC AAGGTT<br>AC<br>rev: GTAACCTTGACAAGCTCTAATGCACAATAACCA<br>TC                  | QuikChange<br>mutagenesis |



|                                                     |                                                                                                        |                              |
|-----------------------------------------------------|--------------------------------------------------------------------------------------------------------|------------------------------|
| STIC2 E112A                                         | for: GGTTATTGTGCAGGCGCGCTTGTC AAGGTTAC<br>G<br>rev:<br>CGTAACCTTGACAAGCGCGCCTGCACAATAACC               | QuikChange<br>mutagenesis    |
| STIC2 K115A                                         | for: GCAGGCGAGCTTGTGCGGGTTACGTTATCAGG<br>rev: CCTGATAACGTAACCGCGACAAGCTCGCCTGC                         | QuikChange<br>mutagenesis    |
| STIC2 E131G                                         | for: [5' phos] GGAGCAGCAATGGAAGTGGTTCC<br>rev: [5' phos] GGTAATATCAGTACGGATTGG                         | Site-directed<br>mutagenesis |
| <b>pET29b-</b>                                      |                                                                                                        |                              |
| Alb3C $\Delta$ III (aa 350-462<br>$\Delta$ 386-403) | for: GGATGATGCGGCGGTGGCGAAAGATACCGT<br>rev: TCGCCACCGCCGCATCATCCGGCTGCGC                               | InFusion                     |
| Alb4C $\Delta$ III (aa 334-499<br>$\Delta$ 397-414) | for: GAATGCCCCAAACCTGAAGAGAGGCAGAAAGC<br>TGAAGCAG<br>rev: TTTCTGCCTCTCTTCAGGTTTGGGGCATTCTG<br>GGGTCACC | InFusion                     |
| Alb4C R399G                                         | for: [5'phos] GGGTTTAGGCTGCTGAAAGAGCAA<br>rev: [5'phos] TTCACCAGGTTTGGGGCATTCTC                        | Site-directed<br>mutagenesis |
| Alb4C F400G                                         | for: [5'phos] GGTAGGCTGCTGAAAGAGCAAGAA<br>rev: [5'phos] CCTTTCACCAGGTTTGGGGCA                          | Site-directed<br>mutagenesis |
| Alb4C E407G                                         | for: [5'phos] GGAGCAAAGAGACGTCGAGAAAAA<br>rev: [5'phos] TTGCTCTTTCAGCAGCCTAAA                          | Site-directed<br>mutagenesis |
| Alb4C R410G                                         | for: [5'phos] GGACGTCGAGAAAAAGAAGAGAGG<br>rev: [5'phos] CTTTGCTTCTTGCTCTTTCAGCAG                       | Site-directed<br>mutagenesis |
| <b>pGEX4T3-</b>                                     |                                                                                                        |                              |
| STIC2 (aa 49-182)                                   | for: ATCTGGTTCCGCGTGGATCCGTGAATGGATTAT<br>TTGG<br>rev: GGCCGCTCGAGTCGACTTACTTCATTCTTCG<br>CTGA         | InFusion                     |
| STIC2 G111L                                         | for: ATCTGGTTCCGCGTGGATCCGTGAATGGATTAT<br>TTGG<br>rev: GGCCGCTCGAGTCGACTTACTTCATTCTTCG<br>CTGA         | Classical cloning            |
| STIC2 E112A                                         | for: ATCTGGTTCCGCGTGGATCCGTGAATGGATTAT<br>TTGG<br>rev: GGCCGCTCGAGTCGACTTACTTCATTCTTCG<br>CTGA         | Classical cloning            |
| STIC2 K115A                                         | for: ATCTGGTTCCGCGTGGATCCGTGAATGGATTAT<br>TTGG<br>rev: GGCCGCTCGAGTCGACTTACTTCATTCTTCG<br>CTGA         | Classical cloning            |
| STIC2 E112A K115A                                   | for: [5'phos]GCGCTTGTGCGGGTTACGTTATCA<br>rev: [5'phos]GCCTGCACAATAACCATCAAATTC                         | Site-directed<br>mutagenesis |
| STIC2 E131G                                         | for: AGTGGATCCGATGGACAATCAAAGGCAGGA<br>rev: GGCCGCTCGAGTCGACTTACTTCATTCTTCG<br>CTGA                    | Classical cloning            |

## Appendix Supplementary Materials and Methods

### *Sucrose gradient enrichment of RNCs*

For sucrose cushion centrifugation 160  $\mu$ l of the translation reaction were loaded on a 2.9 ml sucrose cushion (1 M sucrose, 30 mM HEPES pH 7.7, 9 mM magnesium acetate, 70 mM potassium acetate, 2  $\mu$ g/ml antipain, 2  $\mu$ g/ml leupeptin, 5 mM DTT, 0.25 mg/ml chloramphenicol, 0.1 mM AEBSF) and centrifuged (270,000 g, 90 min, 4°C, TLA 100.3, Beckman Coulter). The pellet was solubilized in sample buffer and subsequently applied to SDS-PAGE and Western blot analyses.

### *Affinity purification <sup>35</sup>S-methionine labelled RNCs*

For SDS-PAGE and subsequent autoradiography analyses, the 40  $\mu$ l *in vitro* translation reactions contained 20  $\mu$ M 19 amino acid mix (Promega) and 0.45  $\mu$ Ci/ $\mu$ l of [<sup>35</sup>S]-methionine (>1,000 Ci/mmol, Hartmann Analytics). The isolation of RNCs with MagStrep XT magnetic beads was essentially performed as described above with 30  $\mu$ l of bead suspension.

### *Genomic DNA extraction and genotyping of Arabidopsis thaliana ffc stic2 double mutants*

Potential *ffc stic2* double mutants were genotyped via PCR. Genomic DNA serving as template DNA was extracted according to Edwards et al. (1991) with the following modifications. After extraction of DNA from 2-3 small leaves, the air-dried DNA pellet was resuspended in 40  $\mu$ l 10 mM Tris pH 6.7, 0.1 mM EDTA. Dissolved DNA is then incubated at 55°C for 15 min and briefly vortexed every 5 min. Subsequently, unresolved DNA and impurities were sedimented (5 min, 14,000 rpm, RT). The DNA-containing supernatant was further used for genotyping PCRs using GoTaq® Polymerase (Promega). The 10 kb DNA insertion into intron 8 in At5g03940 (*ffc*) was analyzed using a primer combination binding in exon 8 and 9 (Appendix Table S2). Primer binding in the 5' UTR of At2g24020 (*stic2*) and its coding sequence were used to analyze the T-DNA insertion into At2g24020. T-DNA insertion was verified by amplifying the T-DNA's left border and its localization within the 5' UTR of *stic2* was verified by amplification of the transition from the *stic2* 5' UTR to the T-DNA.

### *Blue-native-polyacrylamide gel electrophoresis*

Thylakoids isolated from chloroplasts of from *Arabidopsis thaliana* plants (Col-0, *ffc1-2* (*ffc*), *stic2-3* (*stic2*) and *ffc1-2 stic2-3* (*ffc stic2*)) were solubilized with 1.5% (w/v) n-dodecyl- $\beta$ -D-maltosid (DDM) at a chlorophyll concentration of 1 mg/mL. The multiprotein complexes were separated by a 4-16% Blue-native-polyacrylamide gel electrophoresis (BN-PAGE) gradient according to the manufacturer's instructions (Invitrogen) using total amounts of 10  $\mu$ g chlorophyll/lane.

### **Appendix Supplementary References**

Armbruster U, Zühlke J, Rengstl B, Kreller R, Makarenko E, Rühle T, Schünemann D, Jahns P, Weisshaar B, Nickelsen J et al. (2010) The Arabidopsis thylakoid protein PAM68 is required for efficient D1 biogenesis and photosystem II assembly. *Plant Cell* 22: 3439–3460. DOI: 10.1105/tpc.110.077453.

Che L, Meng H, Ruan J, Peng L, Zhang L (2022) Rubredoxin 1 Is Required for Formation of the Functional Photosystem II Core Complex in *Arabidopsis thaliana*. *Front Plant Sci* 13: 824358. DOI: 10.3389/fpls.2022.824358.

Edwards K, Johnstone C, Thompson C (1991) A simple and rapid method for the preparation of plant genomic DNA for PCR analysis. *Nucleic Acids Res* 19: 1349. DOI: 10.1093/nar/19.6.1349

Granvogl B, Reisinger V, Eichacker LA (2006) Mapping the proteome of thylakoid membranes by de novo sequencing of intermembrane peptide domains. *Proteomics* 6: 3681–3695. DOI: 10.1002/pmic.200500924.

Wittenberg G, Järvi S, Hojka M, Tóth SZ, Meyer EH, Aro EM, Schöttler MA, Bock R (2017) Identification and characterization of a stable intermediate in photosystem I assembly in tobacco. *Plant J* 90: 478–490. DOI: 10.1111/tpj.13505
